1 **Title:** Detecting mosaic patterns in phenotypic disparity

2 Caroline Parins-Fukuchi

3 Department of Ecology and Evolutionary Biology, University of Michigan, Ann Arbor, MI 48109.

4 **Keywords:** modularity, continuous traits, tempo and mode, macroevolution, phylogenetics.

5 Contents: Abstract, Introduction, Materials and Methods, Results/Discussion, Supplementary

6 Information, Bibliography, Figures 1-4, Table S1.

7 Word count: 5042

8 **ABSTRACT**

9       Understanding the patterns underlying phenotypic diversification across the tree of life has  
10 long been a fundamental aim in evolutionary and comparative biology. Classic and recent work  
11 has demonstrated both the wide variability in evolutionary rate throughout time and across  
12 lineages and the importance of characterizing these patterns in explaining the evolutionary  
13 processes that generate biological diversity. A less extensive literature has shown that this  
14 variability extends to different aspects of phenotype, with separate suites, or modules, of traits  
15 within organisms showing different, "mosaic" patterns in rate and disparity across species. A  
16 merging of these two perspectives would identify modules of traits that display similar mosaic  
17 patterns in evolutionary tempo and mode. However, tools to do so have been limited. In this  
18 study, I introduce a new method for the identification of suites, or modules, of continuous traits  
19 that display shared patterns in evolutionary disparity across lineages. The approach defines a  
20 separate model of evolutionary disparification for each module defined by a phylogeny with  
21 branch lengths proportional to disparity. Module memberships and the number of modules are  
22 inferred using a greedy hill climbing approach that combines several different strategies to the  
23 unsupervised learning of classification and mixture models.

24 **Introduction:** Characterizing the ways in which phenotypic disparity and evolutionary rates  
25 differ across lineages and throughout time has long been a central goal in evolutionary biology.  
26 Shifts in the rate of phenotypic change often coincide with the emergence of charismatic taxa,  
27 driving ecological differentiation between lineages. Early studies examined rates of change in a  
28 small number of traits, and identified a broad range of patterns of phenotypic change as lineages  
29 diverge (Simpson 1944; Stanley 1979).

30 A more recent body of work has focused on the development of statistical methods that  
31 identify patterns of phenotypic change using phylogenies (Harvey and Pagel 1991; Hansen 1997;  
32 Butler and King 2004; O'Meara *et al.* 2006; Beaulieu *et al.* 2012). These approaches have helped  
33 to reveal large-scale evolutionary trends across major lineages. These studies have frequently  
34 focused on increasing the phylogenetic and temporal scale compared to previous studies by  
35 focusing on only one or a small number of phenotypic characters either in isolation, or taken as a  
36 proxy for phenotype. For instance, although several studies have examined evolutionary rates  
37 using more comprehensive morphometric datasets (Rabosky and Adams 2012), adult body size is  
38 more commonly used in studies of animal taxa as a proxy for more detailed morphological  
39 measurements to characterize general patterns over deep timescales (Harmon *et al.* 2003, 2010;  
40 Burbrink and Pyron 2010; Rabosky *et al.* 2013; Bokma *et al.* 2015; Landis and Schraiber 2017).  
41 In plants, researchers often examine associations between a small number of key traits (Ree and  
42 Donoghue 1999; Beaulieu *et al.* 2007; Zanne *et al.* 2014).

43 The work described above has contributed greatly to both the empirical and conceptual  
44 understandings of patterns in the tempo and mode of phenotypic evolution across large and small  
45 timescales. Nevertheless, the typical focus on only a small number of characters has left open  
46 major questions surrounding the variation in pattern across body plans. Mosaic evolution is

47 expected to underlie most phenotypic change given the understanding that different traits are  
48 often exposed to selective pressures at different times. Researchers have argued for the ability of  
49 mosaic patterns to explain the emergence of structural variation in the brain across mammals  
50 (Barton and Harvey 2000), phenotypic and genomic diversity across angiosperms (Stebbins  
51 1984), and the unique suite of morphological characters displayed by humans (McHenry 1975;  
52 Gould 1977; Holloway and Post 1982). However, despite their prevalence, mosaic evolutionary  
53 patterns have remained underexplored.

54 Biological modularity is a related concept that describes the tendency for suites of traits to  
55 contribute to a shared pattern or function, and has been explored at several phenotypic levels,  
56 including morphology (Cheverud 1982; Goswami 2006; Goswami *et al.* 2009), development  
57 (Wagner and Altenberg 1996), and gene expression (Brawand *et al.* 2011). Modularity can  
58 describe several different aspects of genotype and phenotype. Borrowing terminology from  
59 Wagner *et al.* (2007), the multivariate comparative approaches described above and other studies  
60 in morphology (Goswami 2006) are often focused on identifying ‘variational’ modules, or suites  
61 of traits that covary. Molecular studies often focus on ‘functional’ modules, or suites of features  
62 that contribute to some shared biological function. Developmental modules have also been  
63 explored, both on their own (Laurin 2014), and in association with variational morphological  
64 modules (Goswami *et al.* 2009).

65 Several researchers have contributed statistical approaches for geometric variables describing  
66 morphological shape, which are generally measured in multiple covarying dimensions (Adams  
67 2014a). These approaches can be used to statistically evaluate known differences in evolutionary  
68 rate in predefined suites of continuous traits in a likelihood framework (Revell and Harmon 2008;  
69 Adams 2014b). This work has been a major benefit to researchers seeking to examine patterns in

70 variation of morphological shape. However, these methods can be impractical in several different  
71 situations. For instance, the boundaries dividing suites traits are often unknown, and so searching  
72 for suites of traits with shared signal in evolutionary rate or disparity may present unique insights.  
73 The focus of these methods on explicitly estimating rate also imposes the need to scale branch  
74 lengths to absolute time, which can create error and bias upon downstream analyses (Title and  
75 Rabosky 2016). A framework that characterizes the evolutionary structure and modularity  
76 underlying large phenotypic datasets using shared disparification patterns may be a useful  
77 complement to existing approaches by providing a point of reference that is not subject to the  
78 challenges involved in dating analyses or full multivariate estimation.

79 In this paper, I present a new method that identifies modules of continuous traits displaying  
80 shared patterns in disparity to reconstruct and characterize the mosaic trends that have shaped  
81 their evolution by forming suites of characters that are best explained by shared phylogenetic  
82 branch lengths along a fixed topology. After introducing the method, I evaluate its performance  
83 using simulated data. I also present an analysis of an empirical dataset of developmental traits  
84 compiled by Rose (2003). This dataset has been analyzed previously for both modularity (Laurin  
85 2014), and rate heterogeneity (Germain and Laurin 2009), and so is well suited to a  
86 re-examination using the method introduced here.

87 The approach is a novel contribution to the existing landscape of phenotypic modularity  
88 studies in both its utility and interpretation. Unlike previous approaches, which typically focus on  
89 variational modules, my method identifies ‘evolutionary’ modules defined by suites of characters  
90 displaying shared patterns in disparity across lineages. Importantly, the functionality of my  
91 approach differs from most previous work on modularity by offering a framework for  
92 machine-guided identification and delimitation of modules. Previous work has generally focused

93 on the statistical validation of modules specified by researchers *a priori*, with very little focus on  
94 ways of quantitatively delimiting modules among traits. Laurin's (2014) approach also delimits  
95 modules in phenotypic data, but my method is, to my knowledge, the only existing approach that  
96 identifies modules using a likelihood-based, phylogenetic framework.

## 97 **Methods and Materials**

### 98 *Implementation*

99 The approach described below is implemented in a program called *greedo*. It is available  
100 freely on Github at (links are available from the journal office). All analyses on simulated and  
101 empirical data were performed using this program.

### 102 *Partitioning traits into modules*

103 The method described here combines several unsupervised learning strategies to partition  
104 traits into separate modules, with each possessing its own set of phylogenetic branch lengths  
105 expressed in units of disparity. These strategies are applied in sequence (Fig. 1), with the goal of  
106 identifying the configuration that yields the lowest AIC score.

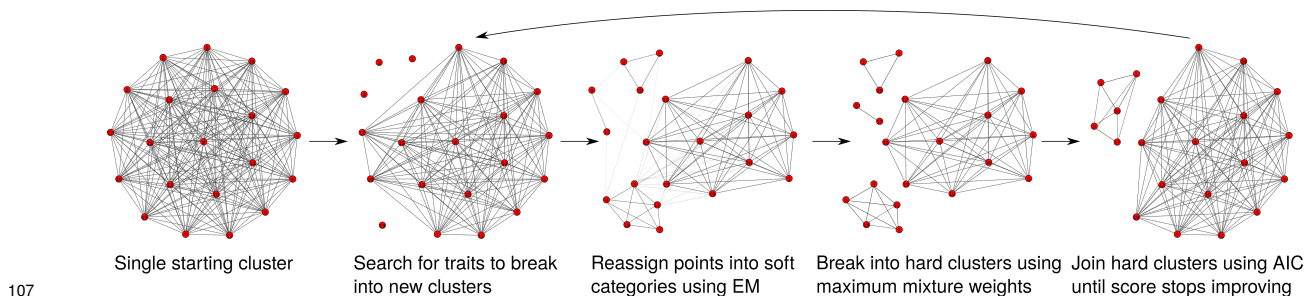

108 **Figure 1.** Search procedure to identify evolutionary modules.

109 Each component that defines the classification model contributes to the likelihood  
110 independently. The log-likelihoods of each of the traits belonging to component  $j$  are calculated  
111 under the component branch lengths, and added to yield the component log-likelihood. The

112 log-likelihood of the trait matrix,  $LL_{\text{classification}}$ , is calculated by summing the log-likelihoods of all  
113  $k$  components

$$LL_{\text{classification}} = \sum_{j=1}^k LL_j \quad (1)$$

114 The details of the underlying phylogenetic Brownian model and the likelihood calculation  
115 follow Felsenstein (1981) and Parins-Fukuchi (2018) and are summarized in the supplement.  
116 Since the number of components is allowed to vary during the search, likelihoods are compared  
117 using the Akaike Information Criterion (AIC) to accommodate the difference in parameter count.

#### 118 *Search procedure*

119 All traits start in a single shared partition. From here, traits that exhibit an improved  
120 likelihood in their own component compared to the single partition are broken into new  
121 components. To prioritize the separation of traits with especially strong divergent signal, a  
122 penalty is imposed that is proportional to the difference in size between the existing components.  
123 As a result, only traits with a strong preference for the new component over the existing  
124 component are selected. This step is repeated either until the number of occupied categories  
125 reaches a user-specified maximum threshold, or there are no more traits left to separate.

126 From here, the problem is temporarily recast as a finite mixture model, with the number of  
127 components corresponding to the user-specified value. First, membership weights are calculated  
128 for each trait-component pair as the probability of the trait ( $x_i$ ) belonging to each  $j$  of  $K$   
129 components. This value is calculated for each component as the proportion of the likelihood of  $x_i$   
130 ( $L_{ij}$ ) under the corresponding set of branch lengths relative to the summed likelihoods of  $x_i$  under  
131 all  $K$  components.

$$P(x_i|K_j) = \frac{L_{ij}}{\sum_{k=1}^K L_{ik}} \quad (2)$$

132 Expectation-maximization (EM) (Dempster *et al.* 1977) is performed to update the mixture  
133 weights and the branch length parameters. The branch lengths of each component are updated as  
134 part of the mixture model, with each site in the matrix contributing to the branch lengths in each  
135 component according to the weights defined above. During this step, the model could be thought  
136 of as a variation of a typical multivariate Gaussian mixture model, where the covariance matrix is  
137 constrained to reflect the structure of a phylogenetic tree, since the phylogenetic Brownian model  
138 yields a multivariate Gaussian likelihood function.

139 Once the mixture model has been updated for several iterations, the components are broken  
140 into hard clusters, with the assignment for each site chosen to be the component with the  
141 maximum mixture weight. This arrangement is then reduced in an agglomerative manner. At  
142 each step of this procedure, the pair of components that results in the greatest improvement in  
143 AIC, calculated using the classification likelihood defined above, is merged. This merging  
144 continues until either the AIC score cannot be further improved, or only a single component is  
145 left. The entire procedure is then repeated from this reduced configuration for a user-specified  
146 number of iterations. None of the steps impose a minimum constraint on the size of each cluster,  
147 and so clusters could range in size from including all of the traits to only one trait (although the  
148 latter case was not encountered in

#### 149 *Simulated data*

150 To examine the strengths and shortcomings of the method, I performed tests using simulated  
151 datasets. A single topology of 20 taxa was simulated under a pure-birth model. For each partition



152 of continuous traits, a new set of branch lengths was generated by drawing randomly from either a  
153 gamma or exponential distribution, then simulated under Brownian motion. The rate parameter of  
154 the Brownian process was set to 1 across the entire tree so that the matrices reflected the scale and  
155 heterogeneity of rates resulting from the altered branch lengths. Each matrix contained a single  
156 partition simulated under the original ultrametric branch lengths. The randomly drawn branch  
157 lengths were intended to mimic the differing rates of evolution that can be experienced by  
158 different lineages during evolutionary divergence, with the ultrametric branch lengths reflecting  
159 clock-like evolution (Fig. S1). All trees and traits were simulated using the phytools package in R  
160 (Revell 2012).

161 Using this procedure, matrices comprised of 2, 3, and 4 partitions of 50 continuous traits each  
162 were generated. All traits were rescaled to a variance of 1. I ran *greedo* on these datasets to  
163 attempt to reconstruct these partitions. The maximum number of clusters for these runs was set to  
164 half the number of traits in each matrix.

165 I used the adjusted Rand index (ARI) to evaluate the accuracy of the inferred partitionings  
166 (Hubert and Arabie 1985) against the true partitionings. ARI is a version of the Rand index (RI)  
167 (Rand 1971) that has been corrected for chance. The RI measures congruence by counting the  
168 pairs of elements that either occupy the same or different clusters in both of the two clusterings,  
169 and calculating the proportion of this value relative to all of the possible permutations of  
170 elements. As a result, the RI can range from 0, indicating total disagreement, and 1, indicating  
171 total agreement. The ARI corrects for the propensity for elements to occupy the same cluster due  
172 to chance, with a value of 0 indicating a result indistinguishable from a random assignment of  
173 elements, and 1 indicating complete congruence, and also takes negative values when a clustering  
174 is worse than random.

175 *Empirical analysis*

176 To examine the performance of the method on empirical data, I analyzed a dataset comprised  
177 of the ossification sequences of 21 cranial bones obtained from Laurin (2014), initially assembled  
178 by Rose (2003). Laurin identified developmental modules using an ‘evolutionary’ Principal  
179 Components analysis (PCA) and also performed a distance-based hierarchical clustering of the  
180 data, making these data well-suited to a test of the method introduced here. Using my new  
181 approach, identified modules might be thought of as ‘evolutionary developmental’ modules, since  
182 the dataset is comprised of developmental sequences.

183 In his original analysis, Laurin (2014) fixed the developmental traits between the interval 0-1.  
184 However, this transformation yields data that display different empirical variance across taxa.  
185 This reflects the results of Germain and Laurin (2009), who demonstrated drastic variability  
186 ( 100x) in absolute rate across these characters. To prepare the data for the calculation of  
187 phylogenetic branch lengths, which assume traits of equal variance, I standardized the variance  
188 between the traits to 1. As a result, the analyses of disparity reflect relative, rather than absolute,  
189 ossification times. Importantly, differences in branch lengths across modules should thus be  
190 interpreted as reflecting variation in relative, rather than absolute disparity. The tree used for  
191 comparative analyses in the original study was used to calculate branch lengths (supplementary  
192 data).

193 **Results and Discussion**

194 *Simulated data*

195 The method is generally able to recover the structure of the simulated datasets. The number of  
196 inferred modules is typically close to the true number, and ARI values are typically well above  
197 random. The two-partition analyses are very accurate, with high ARI values, and nearly always

198 correctly identifying the correct number of clusters. The three- and four-partition analyses were  
199 less accurate, but still yield results much higher than random, and typically recovering the correct  
200 number of modules. ARI indices achieved for the three- and four- partition analyses appear  
201 comparable to results from simulated data using more general clustering approaches, such as  
202 Gibbs sampling under a Dirichlet process (Dahl 2006).

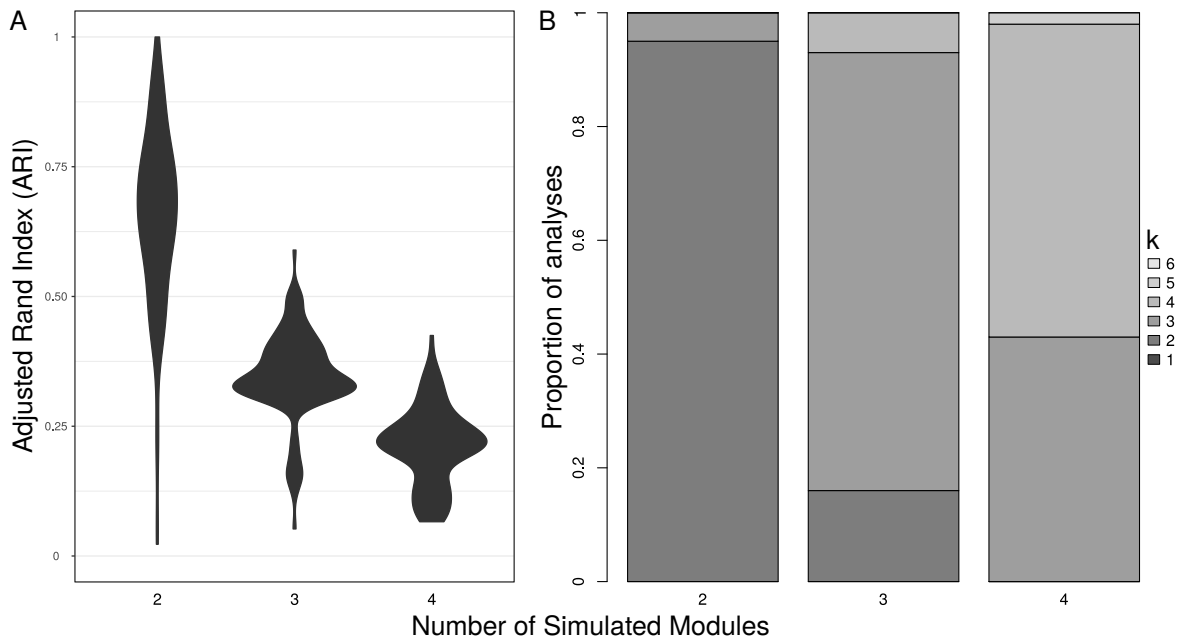

203

204 **Figure 2.** A) Adjusted Rand indices across reconstructions of simulated datasets. B) Number of  
205 clusters resulting from analyses of simulated data. Barplots are stacked to represent the frequency  
206 of each reconstructed  $k$ . All violin and barplots are separated by the number of modules in the  
207 simulated datasets.

208 Despite the generally encouraging results from the simulated data, the trend toward  
209 decreasing accuracy when components are added suggests either a limitation of the method in  
210 adequately exhausting the search space of component assignments or a limitation in the power of  
211 the simulated datasets in displaying sufficient signal across taxa. Since the primary steps of the  
212 search alternate between greedy EM and hierarchical approaches, each iteration identifies a local

213 peak in the likelihood surface. As categories are added, it is possible that the added heterogeneity  
214 causes the surface becomes more peaky by adding permutations of locally optimal configurations.  
215 Because of this tendency, it might be useful to average across a set of best-supported  
216 configurations rather than rely on a single point estimate. It may also be helpful to initialize the  
217 analysis using results obtained from a less intensive approach, such as the evolutionary PCA  
218 developed by Laurin (2014). This may improve performance by requiring the search to traverse  
219 less of the likelihood surface, decreasing the chances of becoming stuck at a peak distant from the  
220 globally optimal configuration.

### 221 *Empirical analysis*

222 Four separate runs each yielded different partitionings into two modules. All arrangements  
223 overlap in their assignments, and the AIC scores are all close to one another. To visualize the  
224 overall support for the categorization of each trait across partitionings, I calculated the AIC  
225 weight of each model (Burnham and Anderson 2002). The AIC weight of model  $i$ ,  $w_i$  can be  
226 interpreted as its probability of being the best model among a set of  $K$  candidates.

$$w_i = \frac{L_i^{rel}}{\sum_{k=1}^K L_k^{rel}} \quad (3)$$

227 where  $L_i^{rel}$  is the relative likelihood of model  $i$ :

$$L_i^{rel} = \exp(-0.5(AIC_i - AIC_{min})) \quad (4)$$

228 These weights were used to visualize the the strengths of the connections between traits across  
229 all the four best partitionings in a graph (Fig. 2b). An edge was drawn between traits  $i$  and  $j$  if they  
230 occurred in the same component in any of the four results, with a weight given by the summed

231 AIC weights of all of the configurations where  $i$  and  $j$  occur in the same module. The maximum  
232 weight possible is 1.0, when traits  $i$  and  $j$  share a module in all of the configurations. The resulting  
233 graph suggests that traits 0, 1, 2, 17, and 20 all form a module, with the rest of the traits sharing a  
234 separate module. This result is very close to the pattern in modularity reconstructed by Laurin  
235 (2014) using an ‘evolutionary PCA’ approach, differing only in the assignment of the stapes  
236 (Table S1). The similarity of the empirical results to those of the original study demonstrate the  
237 capability of the new approach to identify meaningful modules in biological data.

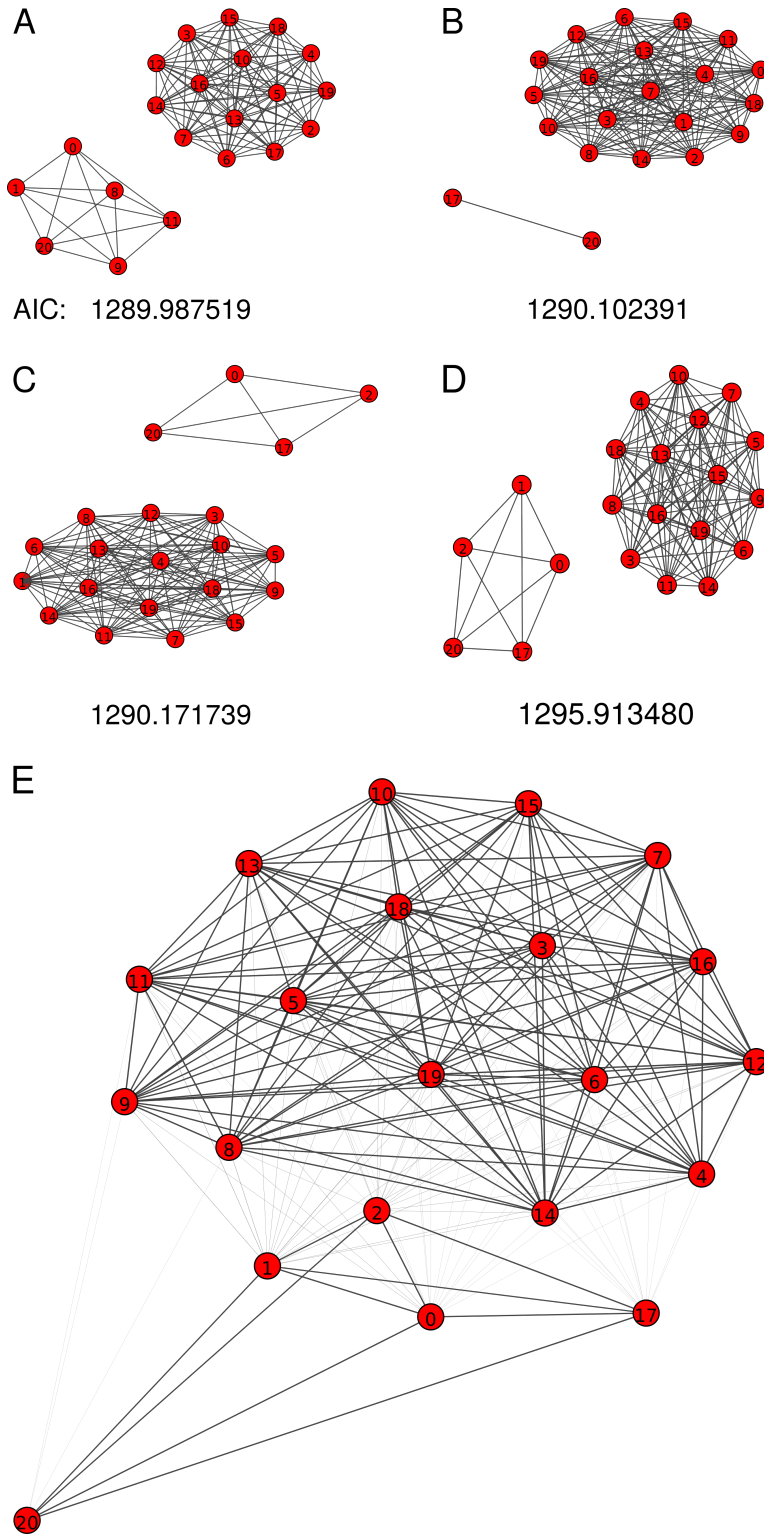

238

239 **Figure 3.** A-D) Four best configurations with AIC scores. E) Weighted graph calculated by

240 summing the AIC weights associated with the each model to form edges and edge weights. All

241 graphs were drawn using the "lgl" format implemented in igraph.

242 In his original study, Laurin (2014) also performed an exploratory hierarchical clustering of  
243 the developmental sequences and found substantial differences in structure as compared to that  
244 revealed by his evolutionary PCA approach. The discordance between results achieved from each  
245 method occurs because the the PCA considers covariance, while the hierarchical clustering only  
246 reflects shared similarity in absolute value. Like the original study, the results here differ  
247 substantially from the pattern resulting from the exploratory hierarchical clustering performed by  
248 Laurin, instead aligning very closely to the PCA approach. This is reassuring for the performance  
249 of my method, as Laurin considered the evolutionary PCA to yield the correct answer, and the  
250 hierarchical clustering to demonstrate the inadequacy of similarity in delimiting meaningful  
251 modules (Laurin, pers. comm.). Although they differ in the specific criteria used to identify  
252 modules, the similarity in results between my and Laurin's method are not surprising. Laurin's  
253 PCA method identifies structure from patterns in covariance that have been corrected for  
254 phylogenetic non-independence, whereas my method identifies a minimally complex set of  
255 models, defined by phylogenies with non-negative branch lengths. The trees describing each  
256 module in my method may be thought of as representing disparity between taxa as patristic  
257 distances. And so, although they differ in formulation and statistical paradigm, both approaches  
258 are similar in their treatment of phenotypic variation. The method described here may be useful  
259 as a complement to existing approaches of modularity by achieving similar results to other  
260 evolutionary focused approaches, but benefiting from its placement in a likelihood and  
261 information-theoretic framework, such as the ability to compare and average models.

262 The graph-based model averaging approach was shown in the empirical analysis to be  
263 particularly useful in distilling the information across multiple well-supported module

264 configurations to smooth over imperfections in optimization. The importance of this step on such  
265 a small dataset, with only two clear modules suggests its potential to improve upon single point  
266 estimates using larger datasets with more clusters. Further tests will be needed to determine  
267 whether the approach can improve estimation in and alleviate the challenges encountered in the  
268 more heterogeneous simulated datasets. This step may also be important in characterizing the  
269 complex signal often encountered in large empirical datasets. Although both my method and  
270 previous approaches using PCA both yield a single ‘hard’ classification of traits into modules,  
271 biological data can often display a complicated network of interactions that can undermine such  
272 point estimates. In addition to smoothing over challenges in traversing peaky likelihood surfaces,  
273 the model averaging approach used above may also help to accommodate the complex variation  
274 in empirical data by weighting and combining evidence from a set of well-supported candidate  
275 models.

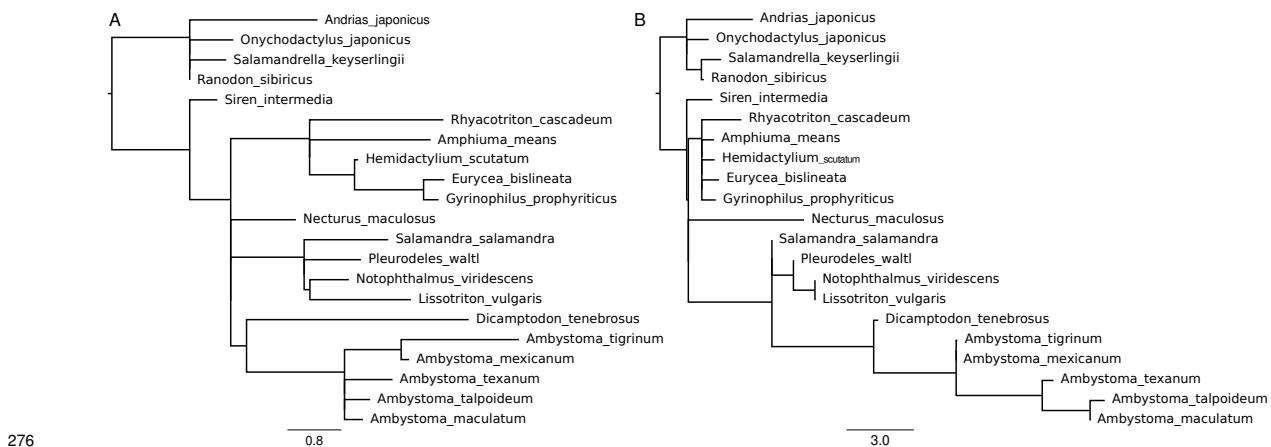

277 **Figure 4.** Branch lengths reconstructed from traits contained within: A) module 0 (Table S1); B)  
278 module 1 (Table S1).

279 The method that I introduce here identifies modules of continuous traits displaying similar  
280 patterns in evolutionary divergence. This may be useful in several different scenarios. As is stated



281 in the introduction, existing comparative studies tend to focus on only one or a small number of  
282 traits. Although this may in part be a result of the challenges in assembling large phenotypic  
283 datasets, another possible contributing factor may be the difficulty in performing tests and  
284 interpreting results across large numbers of traits. In these cases, the approach here might be  
285 useful as a preliminary, exploratory step by reducing large phenotypic datasets into a more  
286 tractable set of evolutionary modules. Traditional statistical comparative analyses could then be  
287 performed on the resulting modules rather than on single or arbitrarily joined groupings of traits.  
288 This approach may have the added benefit of increasing the amount of information from which to  
289 infer comparative models. As an alternative to the use of existing comparative methods, disparity  
290 branch lengths associated with each module may themselves yield sufficient information for  
291 evolutionary interpretation on their own. Reconstructed modules show very distinct patterns in  
292 lineage-wide disparity from one another (Fig. 4), and so may be useful in presenting a fine-scaled  
293 picture of the mosaic heterogeneity in pattern displayed across suites of characters.

294 The utility of my approach is distinct from most existing approaches to modularity. Most  
295 previous work exploring modularity has focused upon the statistical testing and validation of  
296 hypotheses of modularity specified *a priori* by the researcher by defining explicitly the  
297 constituent members of each module (Goswami 2006; Goswami *et al.* 2009). In contrast, the  
298 method that I introduce here detects and delimits modules automatically through a  
299 machine-driven search. This is more similar in purpose to the method developed by Laurin  
300 (2014), which also identifies modules, but differs in its explicit formulation in a model-based  
301 phylogenetic framework rather than the frequentist framework used in his approach, and the use  
302 of shared patterns in disparification as the basis of module delimitation rather than covariance.

303 In addition to morphological and developmental phenotypes, the method described here may

304 be useful in identifying evolutionary modules among molecular phenotypic traits, such as  
305 normalized gene expression levels. Expression data have been increasingly examined in a  
306 comparative, phylogenetic context, but previous studies have not had a meaningful way in which  
307 to partition sets of genes. As a result, researchers typically fall back on methods such as binning  
308 all genes expressed in the transcriptome together into a single analysis (Chaix *et al.* 2008),  
309 defining modules based upon functional pathways (Schraiber *et al.* 2013), and using  
310 non-phylogenetic clustering approaches (Brawand *et al.* 2011). The method described here may  
311 benefit such studies by identifying the major axes of variation in evolutionary pattern across  
312 transcriptomic datasets.

### 313 *Evolutionary interpretation of modules*

314 By identifying suites of characters that display similar patterns in disparity across lineages,  
315 my approach seeks to integrate existing work that takes a broad view of the tempo and mode of  
316 phenotypic evolution with under-examined patterns in mosaic evolution. Although the tendency  
317 for different traits to evolve according to different patterns is expected and well documented  
318 (Stanley 1979; Stebbins 1984), there has not yet been an approach that explicitly incorporates  
319 phylogeny to reveal the complex mosaic of patterns in divergence underlying the evolution of  
320 phenotypes. The analyses of simulated and empirical data showed the capability of my new  
321 method to identify biologically meaningful modules of continuous traits that reflect differences in  
322 their patterns in disparity across taxa (Fig. 4). The method will be a valuable tool moving forward  
323 to aid in the identification of such modules by providing a reasonable basis upon which to  
324 perform more detailed comparative tests.

325 Previous studies have shown that morphological (Lynch 1990) and gene expression  
326 phenotypes (Yang *et al.* 2017) often display patterns in rate that are not easily distinguishable

327 from conservative evolutionary forces such as genetic drift and stabilizing selection.  
328 Nevertheless, comparative analysis of key traits used in classic studies (Simpson 1944; Gingerich  
329 1983, 1993) have shown that certain features can show substantial variation in rate across lineages  
330 that can provide crucial evolutionary insights. By segmenting the ‘phenome’ into subsets of traits  
331 displaying similar patterns in disparity, approaches to the identification of evolutionary  
332 modularity such as that introduced here have the potential to improve resolution into patterns of  
333 phenotypic diversification by separating conservatively evolving traits from those experiencing  
334 fluctuations in rate in certain lineages. This can benefit downstream comparative analyses, for  
335 example, by preventing conservatively evolving traits from swamping the signal expressed by  
336 those more erratic in their evolutionary pattern.

337 Characterization of patterns in disparity and evolutionary rate across lineages and their  
338 diversity across different aspects of phenotype have long been two fundamental, overarching  
339 goals in comparative biology. Although a substantive literature has developed a strong framework  
340 through which to understand general patterns in the tempo and mode of phenotypic evolution,  
341 researchers have been somewhat limited in the ability to reconstruct the diversity of pattern  
342 encountered across large datasets. This can probably be attributed to challenges in both the  
343 acquisition and analysis of such datasets. However, recent advances are improving the  
344 accessibility of large phenotypic datasets ranging from the morphological to the molecular scales.  
345 For instance, new developments in increasingly high-throughput methods that quantify  
346 morphology (Chang and Alfaro 2015; Boyer *et al.* 2015) and the increasing efforts of natural  
347 history museums in digitizing specimens as 3D images will yield increasingly large datasets. The  
348 approach introduced here represents an early step toward tackling the analysis of such datasets, by  
349 compressing the information contained within into a more analytically tractable set of modules

350 that display similar patterns in disparity.

351 *Scale and rate*

352 The approach described here seeks to identify suites of traits sharing similar patterns in  
353 evolutionary divergence across lineages. Continuous traits displaying greater empirical variances  
354 will display higher absolute rates of evolution when modeled under Brownian motion, resulting in  
355 differences in the reconstructed tree height across traits. This numerical reality may lead the  
356 method to cluster together traits with similar scales of variability, when it is often more desirable  
357 to identify traits with similar relative divergence patterns. As a result, it may often be beneficial to  
358 transform matrices to standardize the variances across all the traits. Since the units of  
359 measurement of continuous traits are typically arbitrary, this transformation is not likely to  
360 introduce biases.

361 Nevertheless, alteration of the scale of continuous traits may often change the interpretation of  
362 results, and so should be performed thoughtfully. In cases where phenotypes are quantified using  
363 a single, shared set of units, standardization of the variances across traits erases information  
364 characterizing absolute evolutionary rate. In such carefully constructed datasets, including the  
365 matrix of developmental sequences used in the empirical example above, researchers may wish to  
366 quantify differences in absolute evolutionary rate across characters. For instance, using the same  
367 dataset, Germain and Laurin (2009) demonstrated substantial variability in absolute rate across  
368 traits. Study of absolute and relative rates can each yield unique insights into evolutionary  
369 processes, and so the scaling of traits should be considered carefully. Although not explored here,  
370 my approach has the flexibility to examine both absolute and relative disparity depending on  
371 whether or not variances have been standardized between traits. Identification of shared signal in  
372 relative disparity is a more challenging clustering problem, since the erasure of variation in

373 empirical variance creates a flatter likelihood surface, and so the analysis of appropriately  
374 measured and scaled traits for differences in absolute disparity is possible using my approach, and  
375 likely an easier problem than the examples presented here.

### 376 *Phylogenetic signal and evolutionary patterns and processes*

377 Previous approaches to characterizing modularity often emphasize the need to identify  
378 phylogenetic signal in the data to justify the use of phylogenetic comparative approaches (Laurin  
379 2014). Although the approach introduced here uses phylogenies, data need not explicitly display  
380 phylogenetic signal for the approach to be useful. This is because the method uses a species tree  
381 assumed to reflect true divergences as a scaffolding to fit observed patterns of evolutionary  
382 divergence. Since the branch lengths used in this approach reflect disparity, and so can  
383 accommodate patterns ranging from very weak phylogenetic covariance (star-like topology), to  
384 the strong covariance expected under neutral, clock-like phenotypic change by altering the branch  
385 lengths.

386 Although Brownian motion is often interpreted in comparative analyses as a neutral process of  
387 phenotypic change reflecting genetic drift (e.g., Butler and King 2004) occurring under a single  
388 rate, the parameterization used in my approach is more ambiguous. As in previous approaches  
389 (Felsenstein 1981), rate and time are confounded with one another. As a result, a long branch  
390 representing high disparity to adjacent lineages could reflect either a fast rate, or a long time of  
391 divergence. As a result, a tree with heterogeneity in branch lengths could express variation in  
392 evolutionary rates across lineages, or tips that were sampled at different points in time. Since  
393 phenotypic disparity can be generated by a broad range of processes at the population level, the  
394 phylogenetic Brownian model used here does not assume that the traits are selectively neutral.

### 395 *Moving forward*

396 Although the results of the empirical and simulated analyses are generally encouraging, they  
397 also reveal substantial hurdles in the use of the method moving forward. Accuracy decreases with  
398 the number of categories, indicating the need to develop and evaluate more refined approaches to  
399 both the search procedure and in model averaging. Nevertheless, the ability of the graph-based  
400 averaging procedure shown in the empirical analysis to improve the quality of the final result and  
401 sort out overlapping, but conflicting information across a set of well supported configurations  
402 increases the prospects for the method to handle increasingly large phenotypic datasets. Finally,  
403 although possessing caveats, the approach that I introduce here represents a step forward in the  
404 analysis of phenotypic data toward a more thorough integration of studies characterizing tempo  
405 and mode and those identifying modules and mosaic patterns in evolution, and toward the  
406 analytical tractability of large phenotypic datasets.

#### 407 **Acknowledgements**

408 I would like to thank Michel Laurin and Stacey D. Smith for comments that greatly improved  
409 the manuscript.

410 **Supplemental Information**

---

| Index | Bone           | Laurin 2014 module | <i>greedo</i> module |
|-------|----------------|--------------------|----------------------|
| 0     | coronoid       | 1                  | 1                    |
| 1     | vomer          | 1                  | 1                    |
| 2     | palatine       | 1                  | 1                    |
| 3     | dentary        | 0                  | 0                    |
| 4     | premaxillary   | 0                  | 0                    |
| 5     | prearticular   | 0                  | 0                    |
| 6     | squamosal      | 0                  | 0                    |
| 7     | parasphenoid   | 0                  | 0                    |
| 8     | frontal        | 0                  | 0                    |
| 9     | parietal       | 0                  | 0                    |
| 10    | pterygoid      | 0                  | 0                    |
| 11    | exoccipital    | 0                  | 0                    |
| 12    | maxilla        | 0                  | 0                    |
| 13    | quadrate       | 0                  | 0                    |
| 14    | opisthotic     | 0                  | 0                    |
| 15    | prefrontal     | 0                  | 0                    |
| 16    | prootic        | 0                  | 0                    |
| 17    | stapes         | 0                  | 1                    |
| 18    | orbitosphenoid | 0                  | 0                    |
| 19    | nasal          | 0                  | 0                    |

---

| Index | Bone         | Laurin 2014 module | <i>greedo</i> module |
|-------|--------------|--------------------|----------------------|
| 20    | septomaxilla | 1                  | 1                    |

---

411 **Table S1.** Module assignments from original study (Laurin 2014) and the weighted graph in  
412 Fig. 3e. Modules are given arbitrary labels that are consistent for both studies. The two  
413 arrangements differ only in the assignment of the stapes developmental sequence.

414 *Tree model*

415 Each component of the classification model describing the trait matrix is defined by a  
416 phylogeny where the topology is fixed, but its branch lengths are free to vary and calculated from  
417 the constituent traits. Branch lengths are expressed in units of disparity and are calculated using a  
418 Brownian model of evolution. The distribution underlying the traits belonging to each partition  
419 are assumed to be multivariate Gaussian, with variances between taxa defined by the product of  
420 their evolutionary distance measured in absolute time and the instantaneous rate parameter ( $\sigma$ ).

421 The phylogenetic comparative methods literature often estimates  $\sigma$  alone by assuming a fixed  
422 timescale given by branch lengths that have been scaled to absolute time using a clock model.  
423 However, here the absolute times are assumed to be unknown, and the rate and time parameters  
424 are allowed to covary. As a result, branch lengths are expressed in units of Brownian variance (or  
425  $\sigma^2 t$ ). This describes the amount of divergence between taxa, and so can be interpreted as  
426 estimates of phenotypic disparity, averaged across all traits.

427 The likelihood is calculated in a recursion from the tips to the root after Felsenstein (1973).  
428 Full derivations of the likelihood and algorithm are also given by Felsenstein (1981) and  
429 Freckleton (2012), and summarized briefly here. The tree likelihood is computed from the



430 phylogenetic independent contrasts (PICs) using a ‘pruning’ algorithm. Each internal node is  
431 visited in a postorder traversal, and the log-likelihood,  $L_{node}$  is calculated as univariate Gaussian,  
432 with a mean equal to the contrast between the character states,  $x_1$  and  $x_2$  at each subtending edge  
433 and variance calculated as the sum of each child edge,  $v_1$  and  $v_2$ :

$$L_{node} = \frac{1}{2} * \frac{\log(2\pi) + \log(v_1 + v_2) + (x_1 - x_2)^2}{v_1 + v_2} \quad (5)$$

434 The PIC,  $x_{internal}$ , is calculated at each internal node and used as the character representing the  
435 internal node during the likelihood computation at the parent node. The edge length of the  
436 internal node,  $v_{internal}$  is also extended by averaging the lengths of the child nodes.

$$x_{internal} = \frac{(x_1 * v_2) + (x_2 * v_1)}{v_1 + v_2} \quad (6)$$

$$v_{internal} = v_{internal} + \frac{(v_1 * v_2)}{(v_1 + v_2)} \quad (7)$$

437 The total log-likelihood of the tree,  $L_{tree}$  is calculated by summing the log-likelihoods  
438 calculated at each of the  $n$  internal nodes.

$$L_{tree} = \sum_{node=1}^n L_{node} \quad (8)$$

439 The branch lengths associated with each component are estimated using an  
440 Expectation-Maximization procedure that leverages the analytical solution to the maximum  
441 likelihood (ML) branch lengths for a 3-taxon star topology. In this procedure, the tree is treated as  
442 unrooted. Picking a single internal node, PICs are calculated to each of the three connected  
443 branches. These are treated as ‘traits’ at the tips of a three-taxon tree. The edge lengths of the

444 pruned tree ( $v_i$ ) is then computed analytically using the MLE solutions for a three taxon tree  
445 (Felsenstein 1981). This procedure is performed on all of the internal nodes. This process is  
446 iterated until the branch lengths and the likelihoods converge, yielding a local optimum of the  
447 likelihood function. The algorithm and derivation of the 3-taxon ML solutions are given a  
448 detailed explanation by Felsenstein (1981) and summarized by me in a previous article  
449 (Parins-Fukuchi 2018).

#### 450 *Information criteria and overfitting*

451 In the analyses performed here, I exclusively used the AIC, in lieu of the corrected version,  
452 AICc, and the Bayesian Information Criterion (BIC). Previous authors have suggested that the  
453 AICc should be generally preferred to the uncorrected version (Burnham and Anderson 2002).  
454 My preference for the AIC was driven by several factors. The number of clusters is generally  
455 completely unknown prior to the analysis, and perhaps more importantly, there is generally no  
456 single 'true' clustering underlying the mosaic evolutionary patterns sought by the method. As a  
457 result, it might generally be preferable in the context of addressing comparative questions to  
458 identify a small number of spurious components in the final configuration than to ignore  
459 important biological variation that could be missed due to the steeper penalty imposed by the  
460 AICc. The analyses here support this justification. The simulated analyses show that, when AIC  
461 is used, overestimating the number of components is not a major problem (Fig. 2). In addition,  
462 the results of the empirical analysis suggest that more coherent patterns emerge when several  
463 well-supported configurations are averaged. If spurious partitions are encountered in some  
464 arrangements, averaging over the results should generally reveal reasonably strong connections  
465 between points occupying overfit components.

466 Although BIC has been used successfully to select the number of components in mixture

467 models (Fraley and Raftery 1998, 1999), I preferred the behavior and basis of AIC for these  
468 analyses. BIC assumes that the true model is within the set of candidate models, and so can be  
469 sensitive to model-misspecification (Wagenmakers and Farrell 2004). This assumption is  
470 incompatible with the goals of my method, which does not seek to identify a single 'true'  
471 configuration, but instead characterize the major axes of heterogeneity in disparity across  
472 lineages. This goal is more consistent with AIC, which simply seeks to identify the model that  
473 yields the lowest amount of information loss relative to the dataset. Despite my preference for  
474 AIC in the analyses presented here, AICc or BIC may be more appropriate in other situations. As  
475 such, researchers should be thoughtful in their choice of information criterion when performing  
476 the approach introduced here.

477 **References**

- 478 Adams, D. C. 2014a. A method for assessing phylogenetic least squares models for shape and  
479 other high-dimensional multivariate data. *Evolution*, 68(9): 2675–2688.
- 480 Adams, D. C. 2014b. Quantifying and comparing phylogenetic evolutionary rates for shape and  
481 other high-dimensional phenotypic data. *Syst. Biol.*, 63(2): 166–177.
- 482 Barton, R. A. and Harvey, P. H. 2000. Mosaic evolution of brain structure in mammals. *Nature*,  
483 405(6790): 1055.
- 484 Beaulieu, J. M., Moles, A. T., Leitch, I. J., Bennett, M. D., Dickie, J. B., and Knight, C. A. 2007.  
485 Correlated evolution of genome size and seed mass. *New Phytologist*, 173(2): 422–437.
- 486 Beaulieu, J. M., Jhwueng, D.-C., Boettiger, C., and O’Meara, B. C. 2012. Modeling stabilizing  
487 selection: expanding the ornstein–uhlenbeck model of adaptive evolution. *Evolution*, 66(8):  
488 2369–2383.
- 489 Bokma, F., Godinot, M., Maridet, O., Ladevèze, S., Costeur, L., Solé, F., Gheerbrant, E., Peigné,  
490 S., Jacques, F., and Laurin, M. 2015. Testing for depéret’s rule (body size increase) in  
491 mammals using combined extinct and extant data. *Systematic biology*, 65(1): 98–108.
- 492 Boyer, D. M., Puente, J., Gladman, J. T., Glynn, C., Mukherjee, S., Yapuncich, G. S., and  
493 Daubechies, I. 2015. A new fully automated approach for aligning and comparing shapes. *The*  
494 *Anatomical Record*, 298(1): 249–276.
- 495 Brawand, D., Soumillon, M., Necsulea, A., Julien, P., Csárdi, G., Harrigan, P., Weier, M., Liechti,  
496 A., Aximu-Petri, A., Kircher, M., *et al.* 2011. The evolution of gene expression levels in  
497 mammalian organs. *Nature*, 478(7369): 343.
- 498 Burbrink, F. T. and Pyron, R. A. 2010. How does ecological opportunity influence rates of

- 499 speciation, extinction, and morphological diversification in new world ratsnakes (tribe  
500 lampropeltini)? *Evolution: International Journal of Organic Evolution*, 64(4): 934–943.
- 501 Burnham, K. P. and Anderson, D. R. 2002. *Model selection and multimodel inference: a practical*  
502 *information-theoretic approach*. Springer.
- 503 Butler, M. A. and King, A. A. 2004. Phylogenetic comparative analysis: a modeling approach for  
504 adaptive evolution. *Am. Nat.*, 164(6): 683–695.
- 505 Chaix, R., Somel, M., Kreil, D. P., Khaitovich, P., and Lunter, G. 2008. Evolution of primate gene  
506 expression: drift and corrective sweeps? *Genetics*.
- 507 Chang, J. and Alfaro, M. E. 2015. Crowdsourced geometric morphometrics enable rapid  
508 large-scale collection and analysis of phenotypic data. *Methods Ecol. Evol.*
- 509 Cheverud, J. M. 1982. Phenotypic, genetic, and environmental morphological integration in the  
510 cranium. *Evolution*, 36(3): 499–516.
- 511 Dahl, D. B. 2006. Model-based clustering for expression data via a dirichlet process mixture  
512 model. *Bayesian inference for gene expression and proteomics*, 201: 218.
- 513 Dempster, A. P., Laird, N. M., and Rubin, D. B. 1977. Maximum likelihood from incomplete data  
514 via the em algorithm. *Journal of the Royal Statistical Society. Series B (Methodological)*,  
515 39(1): 1–38.
- 516 Felsenstein, J. 1981. Evolutionary trees from gene frequencies and quantitative characters:  
517 finding maximum likelihood estimates. *Evolution*, 35(6): 1229–1242.
- 518 Fraley, C. and Raftery, A. E. 1998. How many clusters? which clustering method? answers via  
519 model-based cluster analysis. *The Computer Journal*, 41(8): 578–588.
- 520 Fraley, C. and Raftery, A. E. 1999. Mclust: Software for model-based cluster analysis. *Journal of*  
521 *Classification*, 16(2): 297–306.

- 522 Freckleton, R. P. 2012. Fast likelihood calculations for comparative analyses. *Methods in Ecology*  
523 *and Evolution*, 3(5): 940–947.
- 524 Germain, D. and Laurin, M. 2009. Evolution of ossification sequences in salamanders and  
525 urodele origins assessed through event-pairing and new methods. *Evolution & development*,  
526 11(2): 170–190.
- 527 Gingerich, P. D. 1983. Rates of evolution: effects of time and temporal scaling. *Science*,  
528 222(4620): 159–161.
- 529 Gingerich, P. D. 1993. Quantification and comparison of evolutionary rates. *Am. J. Sci.*, 293(A):  
530 453–478.
- 531 Goswami, A. 2006. Cranial modularity shifts during mammalian evolution. *The American*  
532 *Naturalist*, 168(2): 270–280.
- 533 Goswami, A., Weisbecker, V., and Sánchez-Villagra, M. 2009. Developmental modularity and the  
534 marsupial–placental dichotomy. *Journal of Experimental Zoology Part B: Molecular and*  
535 *Developmental Evolution*, 312(3): 186–195.
- 536 Gould, S. J. 1977. Bushes and ladders in human evolution. *Ever Since Darwin. Reflections in*  
537 *Natural History*, pages 56–62.
- 538 Hansen, T. F. 1997. Stabilizing selection and the comparative analysis of adaptation. *Evolution*,  
539 pages 1341–1351.
- 540 Harmon, L. J., Schulte, J. A., Larson, A., and Losos, J. B. 2003. Tempo and mode of evolutionary  
541 radiation in iguanian lizards. *Science*, 301(5635): 961–964.
- 542 Harmon, L. J., Losos, J. B., Jonathan Davies, T., Gillespie, R. G., Gittleman, J. L.,  
543 Bryan Jennings, W., Kozak, K. H., McPeck, M. A., Moreno-Roark, F., Near, T. J., *et al.* 2010.  
544 Early bursts of body size and shape evolution are rare in comparative data. *Evolution*:

- 545 *International Journal of Organic Evolution*, 64(8): 2385–2396.
- 546 Harvey, P. H. and Pagel, M. D. 1991. *The comparative method in evolutionary biology*, volume  
547 239. Oxford University Press.
- 548 Holloway, R. L. and Post, D. G. 1982. The relativity of relative brain measures and hominid  
549 mosaic evolution. In *Primate brain evolution*, pages 57–76. Springer.
- 550 Hubert, L. and Arabie, P. 1985. Comparing partitions. *Journal of Classification*, 2(1): 193–218.
- 551 Landis, M. J. and Schraiber, J. G. 2017. Pulsed evolution shaped modern vertebrate body sizes.  
552 *Proceedings of the National Academy of Sciences*, 114(50): 13224–13229.
- 553 Laurin, M. 2014. Assessment of modularity in the urodele skull: an exploratory analysis using  
554 ossification sequence data. *Journal of Experimental Zoology Part B: Molecular and  
555 Developmental Evolution*, 322(8): 567–585.
- 556 Lynch, M. 1990. The rate of morphological evolution in mammals from the standpoint of the  
557 neutral expectation. *The American Naturalist*, 136(6): 727–741.
- 558 McHenry, H. M. 1975. Fossils and the mosaic nature of human evolution. *Science*, 190(4213):  
559 425–431.
- 560 O’Meara, B. C., Ané, C., Sanderson, M. J., and Wainwright, P. C. 2006. Testing for different rates  
561 of continuous trait evolution using likelihood. *Evolution*, 60(5): 922–933.
- 562 Rabosky, D. L. and Adams, D. C. 2012. Rates of morphological evolution are correlated with  
563 species richness in salamanders. *Evolution: International Journal of Organic Evolution*, 66(6):  
564 1807–1818.
- 565 Rabosky, D. L., Santini, F., Eastman, J., Smith, S. A., Sidlauskas, B., Chang, J., and Alfaro, M. E.  
566 2013. Rates of speciation and morphological evolution are correlated across the largest  
567 vertebrate radiation. *Nature communications*, 4: 1958.

- 568 Rand, W. M. 1971. Objective criteria for the evaluation of clustering methods. *Journal of the*  
569 *American Statistical association*, 66(336): 846–850.
- 570 Ree, R. H. and Donoghue, M. J. 1999. Inferring rates of change in flower symmetry in asterid  
571 angiosperms. *Syst. Biol.*, 48(3): 633–641.
- 572 Revell, L. J. 2012. phytools: an r package for phylogenetic comparative biology (and other  
573 things). *Methods Ecol. Evol.*, 3(2): 217–223.
- 574 Revell, L. J. and Harmon, L. J. 2008. Testing quantitative genetic hypotheses about the  
575 evolutionary rate matrix for continuous characters. *Evolutionary Ecology Research*, 10(3):  
576 311–331.
- 577 Rose, C. S. 2003. The developmental morphology of salamander skulls. *Amphibian biology*, 5:  
578 1684–1781.
- 579 Schraiber, J. G., Mostovoy, Y., Hsu, T. Y., and Brem, R. B. 2013. Inferring evolutionary histories  
580 of pathway regulation from transcriptional profiling data. *PLoS Computational Biology*, 9(10):  
581 e1003255.
- 582 Simpson, G. G. 1944. *Tempo and mode in evolution*. Columbia University Press.
- 583 Stanley, S. M. 1979. *Macroevolution, pattern and process*. Johns Hopkins University Press.
- 584 Stebbins, G. L. 1984. Mosaic evolution, mosaic selection and angiosperm phylogeny. *Botanical*  
585 *journal of the Linnean Society*, 88(1-2): 149–164.
- 586 Title, P. O. and Rabosky, D. L. 2016. Do macrophylogenies yield stable macroevolutionary  
587 inferences? an example from squamate reptiles. *Syst. Biol.*, 66(5): 843–856.
- 588 Wagenmakers, E.-J. and Farrell, S. 2004. Aic model selection using akaike weights. *Psychonomic*  
589 *Bulletin & Review*, 11(1): 192–196.
- 590 Wagner, G. P. and Altenberg, L. 1996. Perspective: complex adaptations and the evolution of



591      evolvability. *Evolution*, 50(3): 967–976.

592      Wagner, G. P., Pavlicev, M., and Cheverud, J. M. 2007. The road to modularity. *Nature Reviews*  
593      *Genetics*, 8(12): 921.

594      Yang, J.-R., Maclean, C. J., Park, C., Zhao, H., and Zhang, J. 2017. Intra and interspecific  
595      variations of gene expression levels in yeast are largely neutral:(nei lecture, smbe 2016, gold  
596      coast). *Molecular biology and evolution*, 34(9): 2125–2139.

597      Zanne, A. E., Tank, D. C., Cornwell, W. K., Eastman, J. M., Smith, S. A., FitzJohn, R. G.,  
598      McGlenn, D. J., O’Meara, B. C., Moles, A. T., Reich, P. B., *et al.* 2014. Three keys to the  
599      radiation of angiosperms into freezing environments. *Nature*, 506(7486): 89.
